# Supplementary material for: Blood Transcriptome Response to Environmental Metal Exposure Reveals Potential Biological Processes Related to Alzheimer's Disease
Source: PubMed Central journal article supplement (PMC7609776; doi:10.3389/fpubh.2020.557587), 2020-10-21

# Supplementary Figures S1

**ppq plot of covariates included in the final models.**The ppq plots visualize the distribution of p-values from a anova test when comparing the regression model with and without the respective covariate.

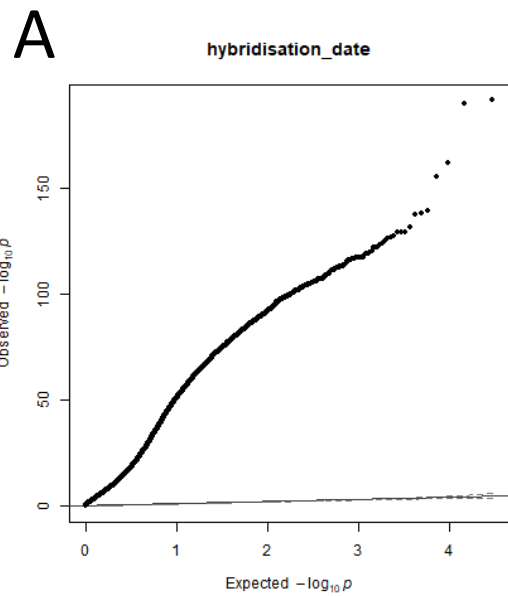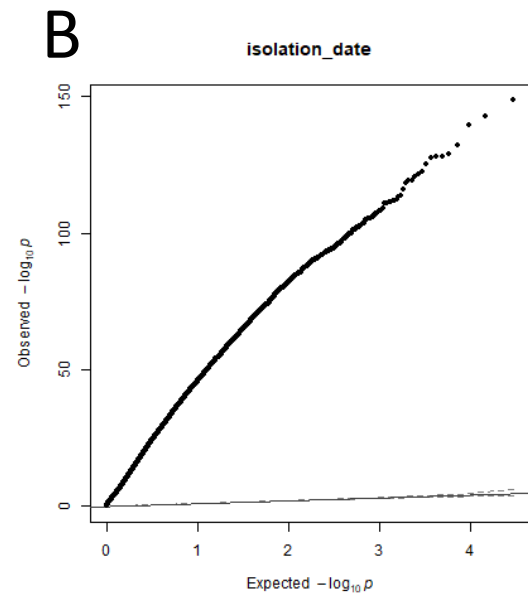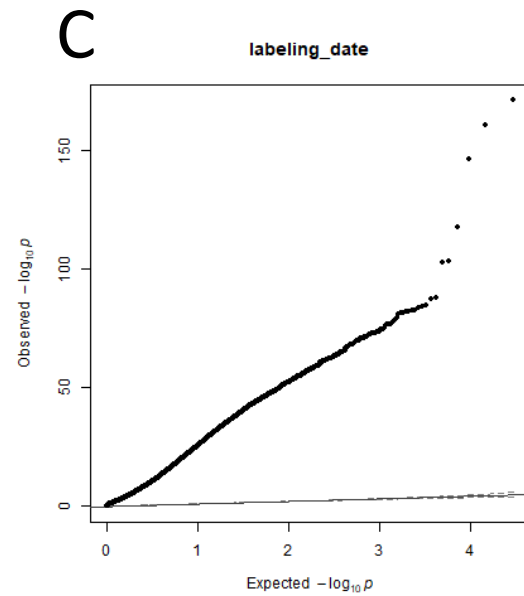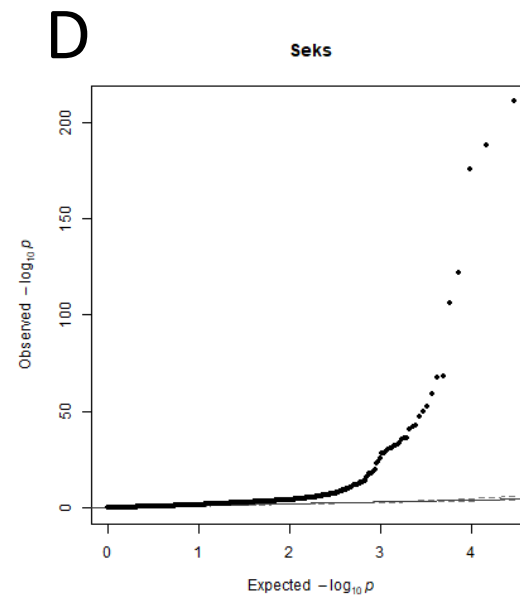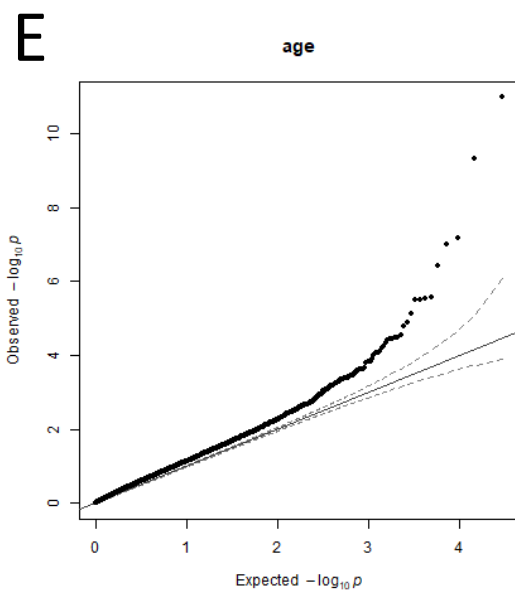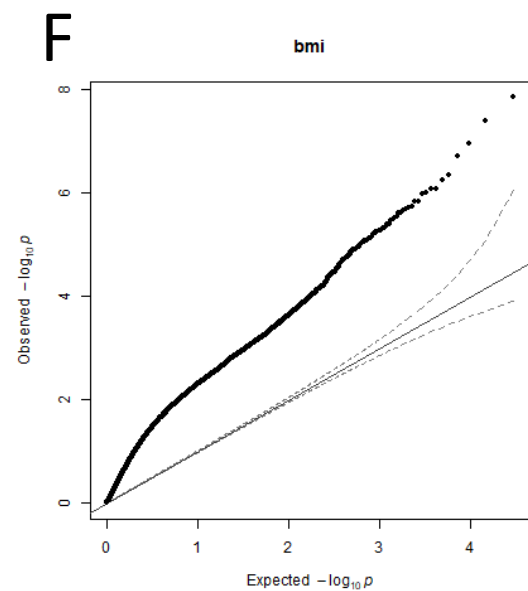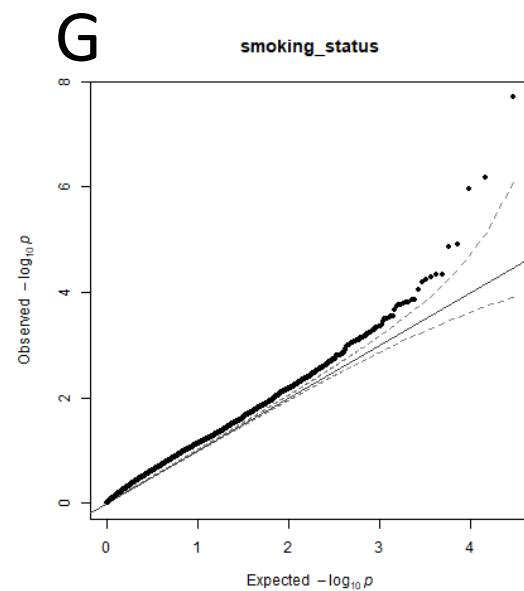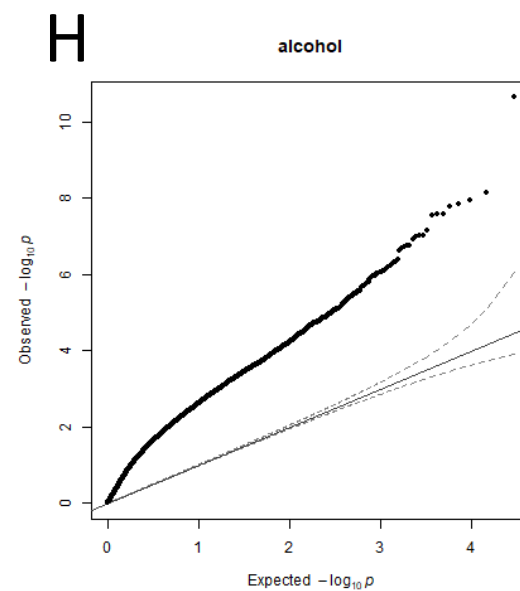

# Supplementary Figures S2

**Overlap of Cd associated genes in males with two recent AD publication.** The Venn diagram show the overlap with the genetic meta-analysis of diagnosed AD patients by Kunkle *et al.*, 2019 (A) and the single cell transcriptomic analysis by Mathys *et al.*, 2019 (B).

**A**

**Kunkle et al**

**Cd assoc. males**

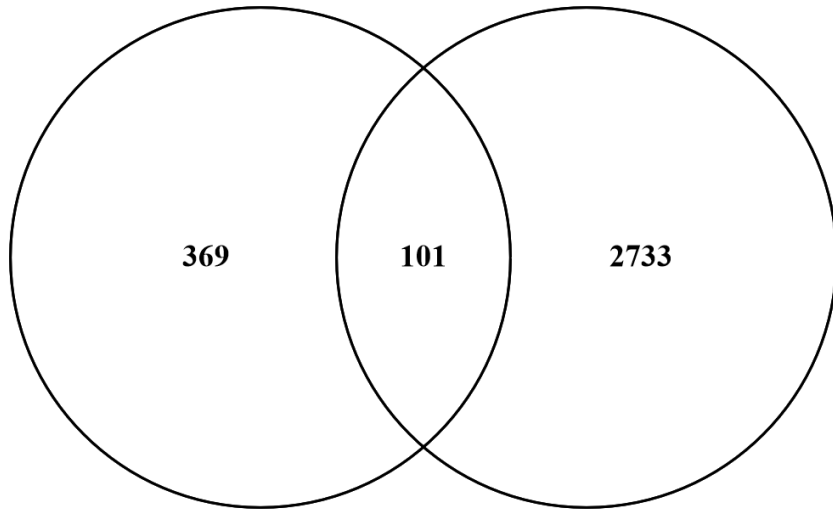

**B**

**Mathys et al**

**Cd assoc. males**

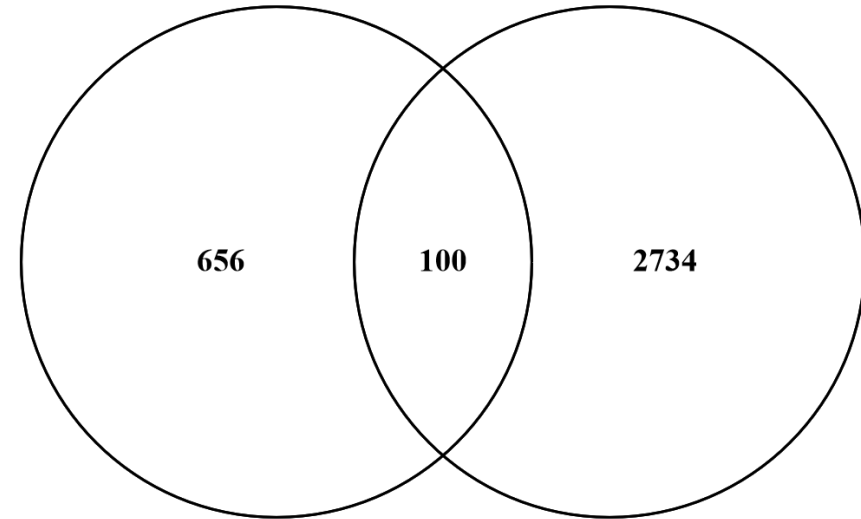

# Supplementary Figures S3

**Expression of top 50 significant Cd associated genes in males across brain samples.** The heatmap shows the expression in transcripts per million (TPM) for the top 50 genes ranked by significance across whole blood and multiple brain regions derived from the GTEx database (version 8) The data shows that the large majority of genes identified in blood are similarly expressed across all brain tissue.

TPM 0.0 2.8 14 56 2.2e+28.4e+2

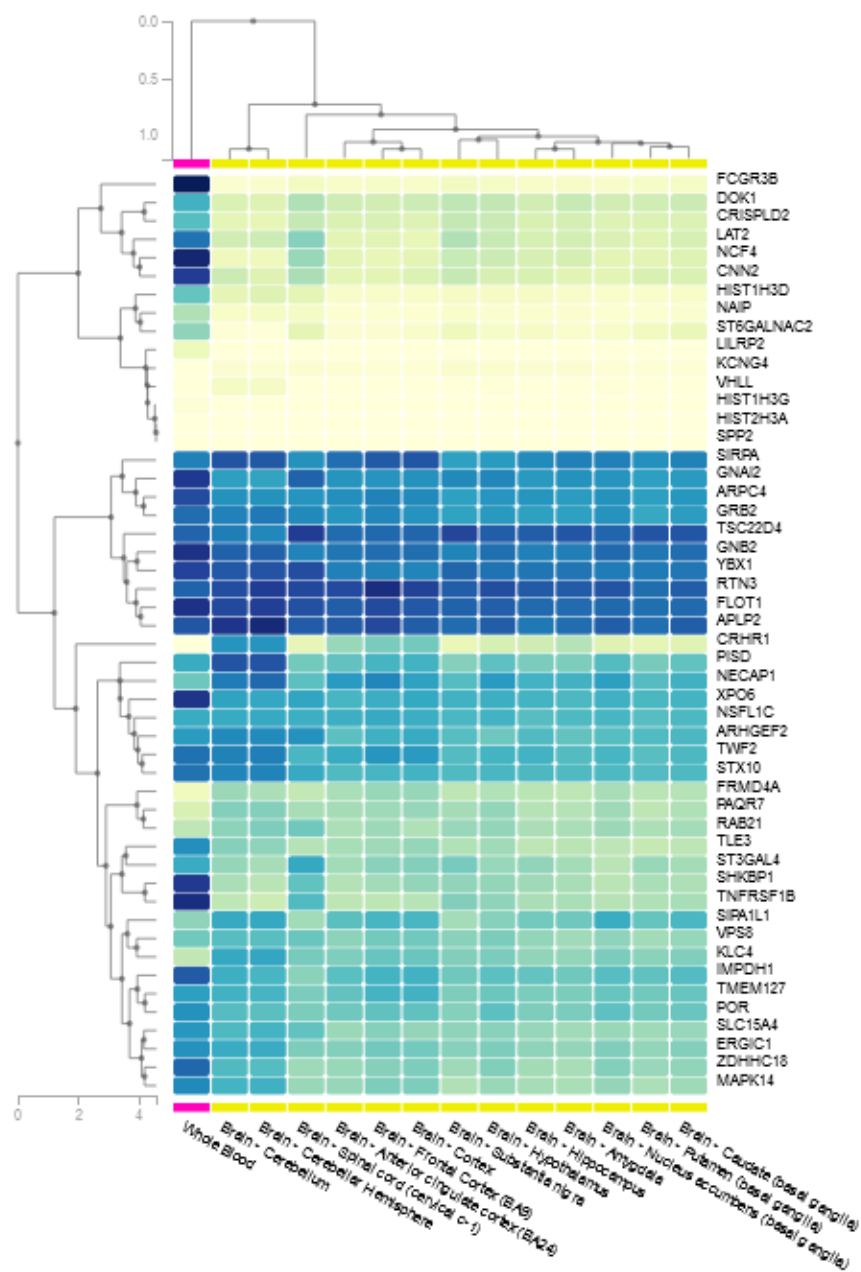

# Supplementary Figures S4

**PPI network of Cd associated genes in males.** The network was obtained from Reactome FIs using Cytoscape. To enable readability of this large network we applied MCL Cluster and only selected for clusters with a minimum of 40 connected nodes. This resulted in 8 subnetworks (A-H). Node sizes indicate the degree. Color indicates a calculated GeneScore derived from the multiplication of the  $\beta$ -coefficient and  $-\log_{10}(\text{pvalue})$ . A red shade indicates a significant positive, a blue shade a significant negative association of the respective transcript with Cd exposure in men.

A

GeneScore

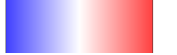

-1 1

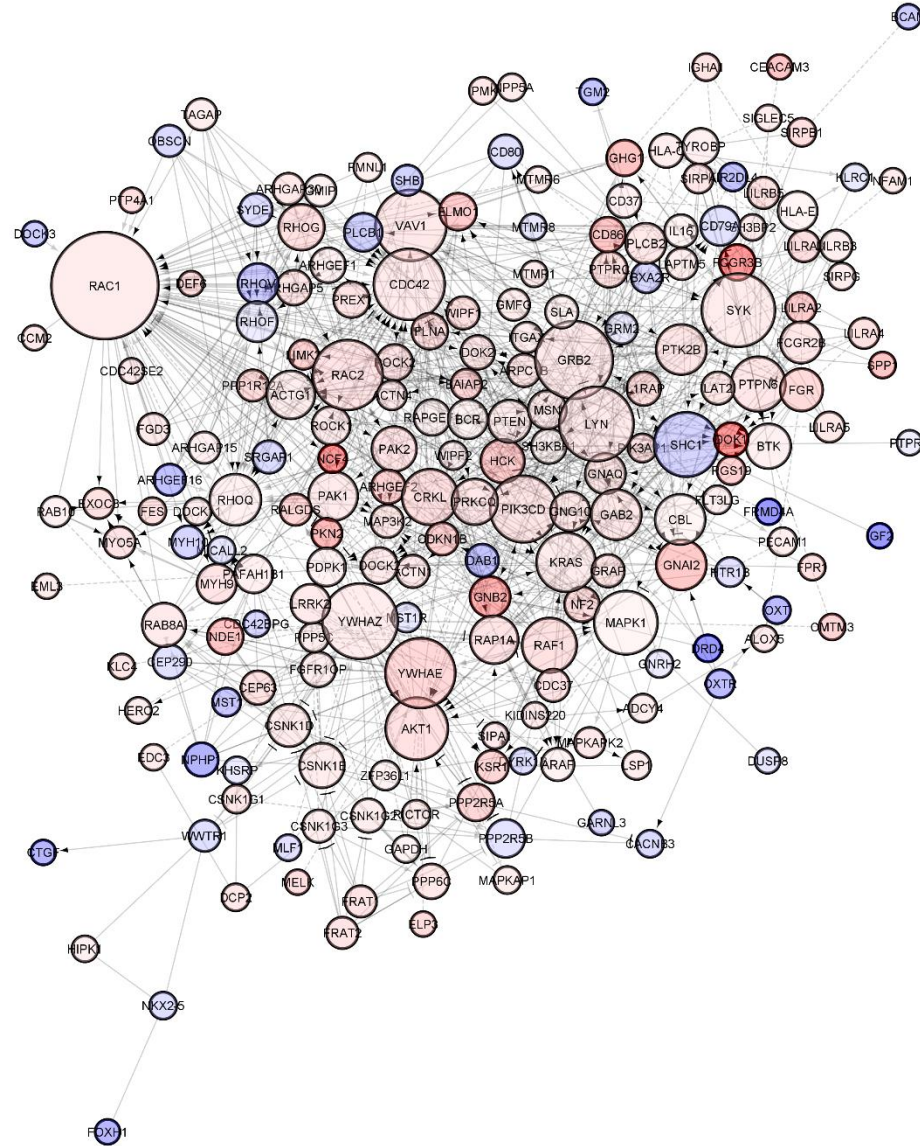



B

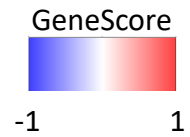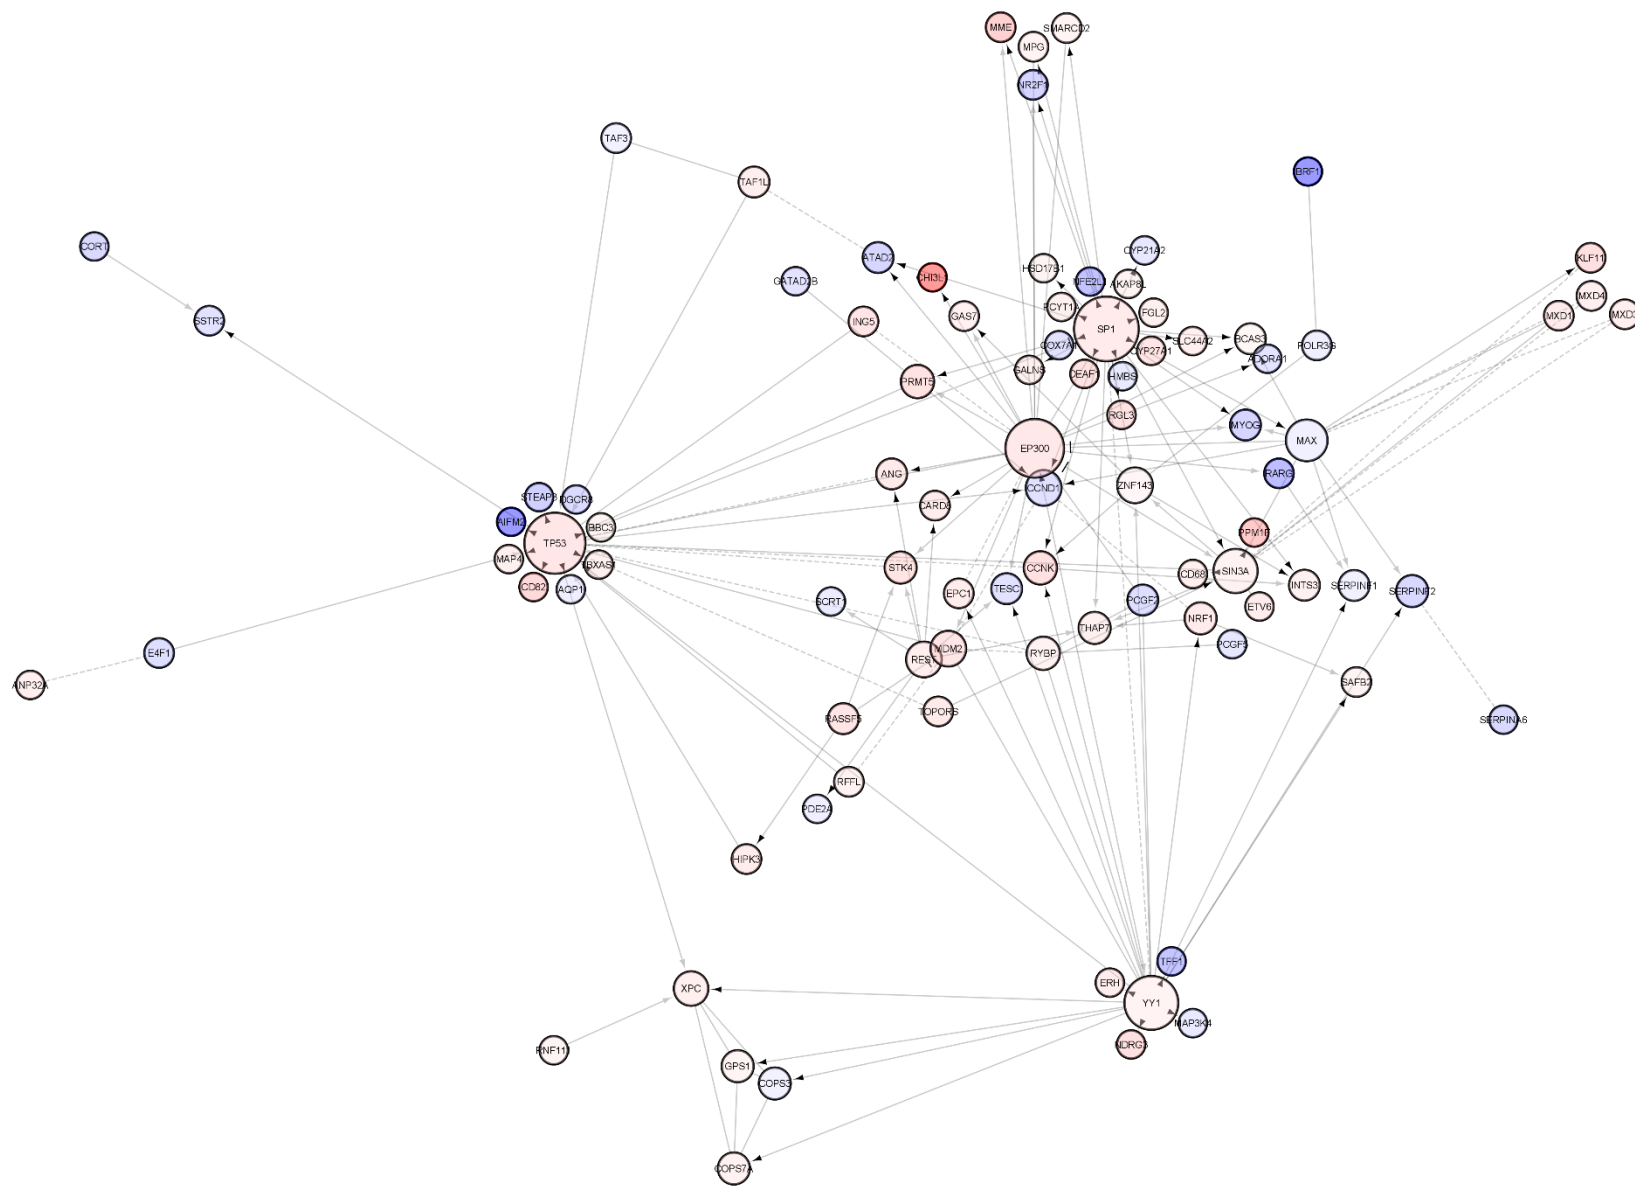



D

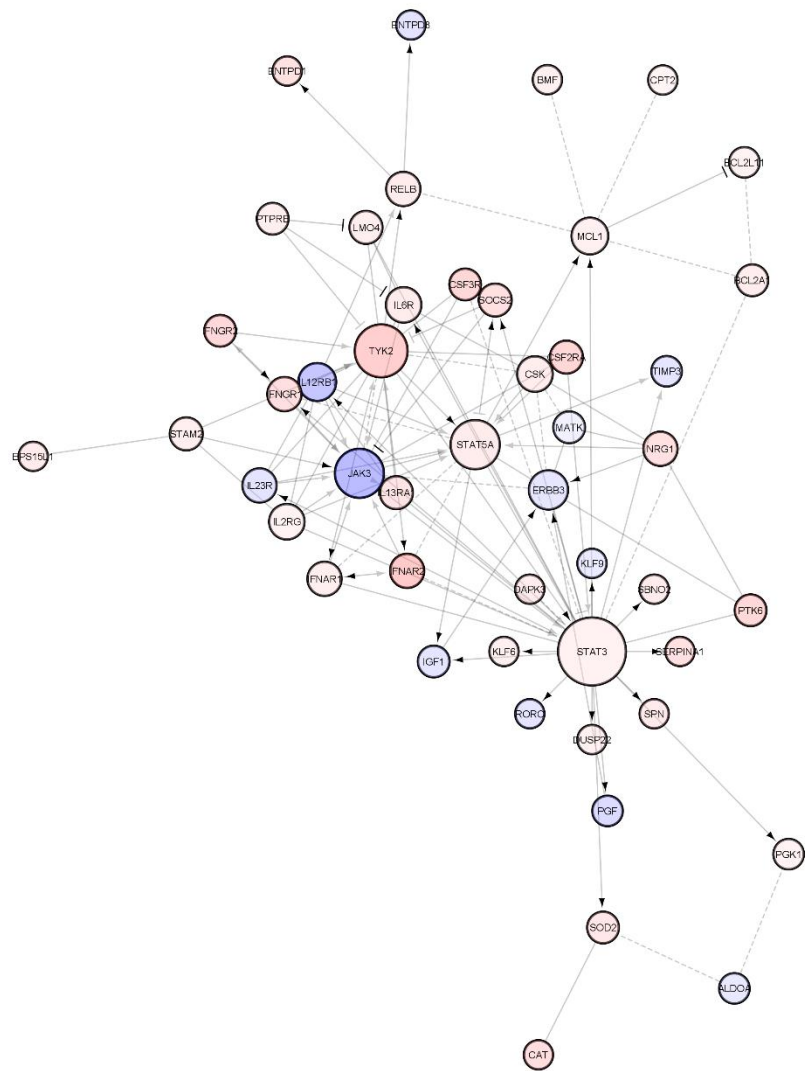

E

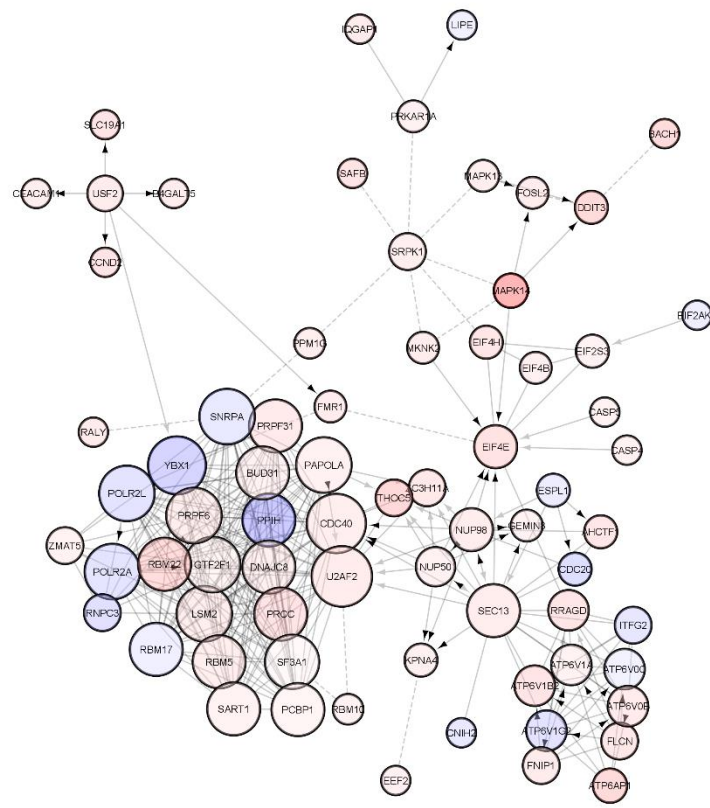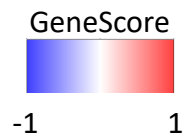

F

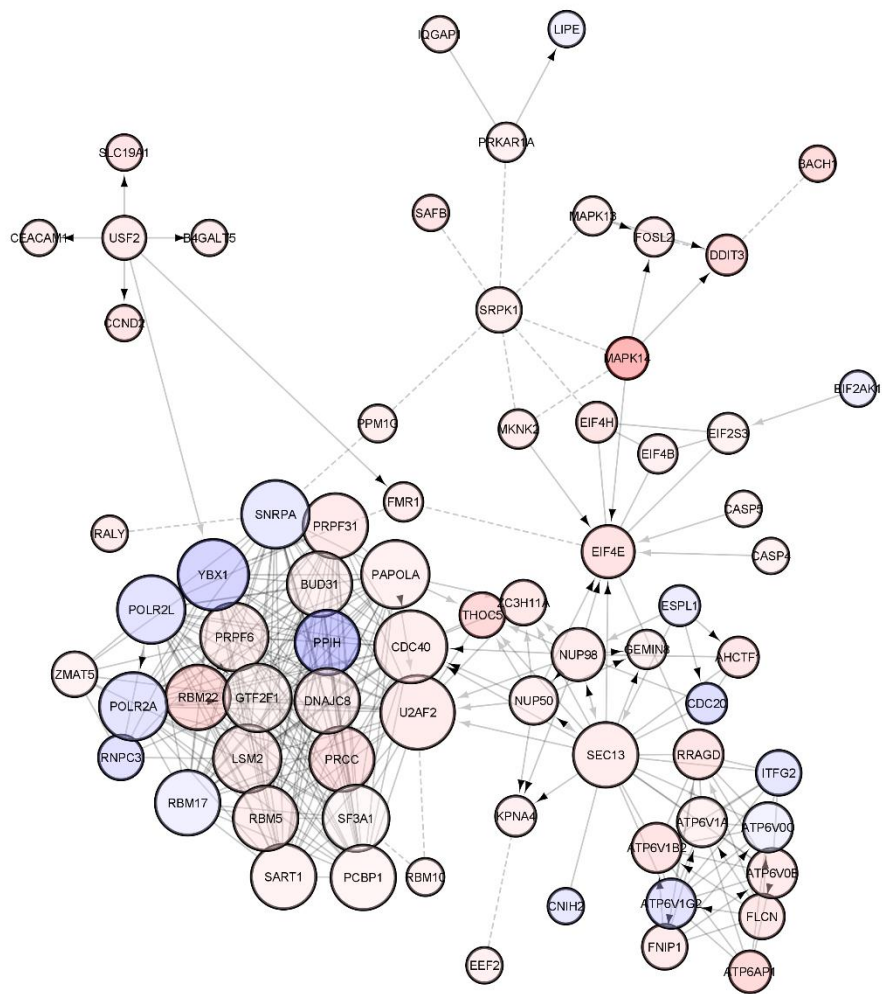

G

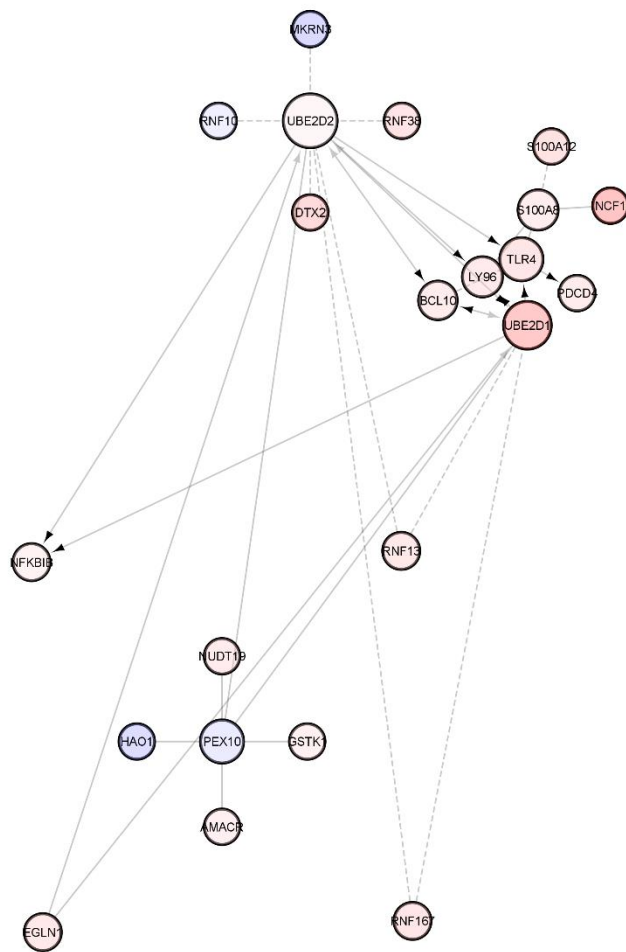

H

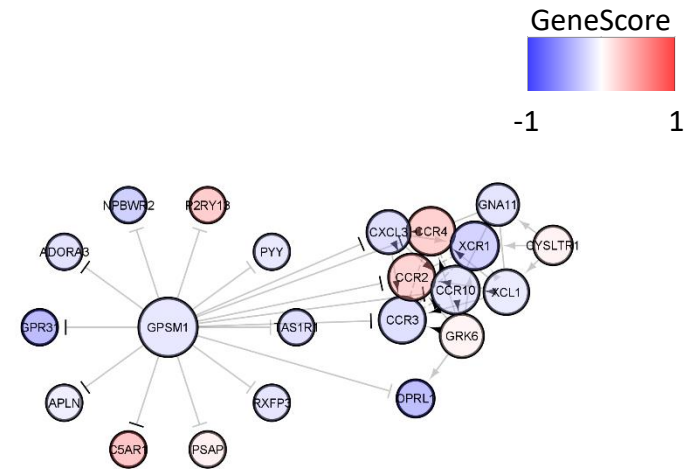

Supplement: Data_Sheet_1.pdf [file Data_Sheet_1.pdf]
